# Supplementary material
Source: MDPI journal article supplement (https://www.mdpi.com/2076-0760/12/2/95)
Supplement: s1 [file s1]

## Google Scholar profiles

### Female Hyphenated Surname Condition

|                                                                                                                                                                     |                                                                                                                                                                                                                                                                                                                                                                                         |
|------------------------------------------------------------------------------------------------------------------------------------------------------------------------------------------------------------------------------------------------------|-----------------------------------------------------------------------------------------------------------------------------------------------------------------------------------------------------------------------------------------------------------------------------------------------------------------------------------------------------------------------------------------|
|                                                                                                                                                                     | <div><b>Jeanette Vertesi-Reynolds</b></div> <div>Assistant Professor of Psychology, <a href="#">Baudley University</a><br/>Verified email at <a href="#">baudley.edu</a> - <a href="#">Homepage</a><br/><a href="#">developmental psychology</a> <a href="#">social psychology</a></div> <div></div> |
| <u>TITLE</u>                                                                                                                                                                                                                                         | YEAR                                                                                                                                                                                                                                                                                                                                                                                    |
| <a href="#">Personality, learning style, intellectual ability, motivation and academic success of psychology students in higher education</a><br>JL Hicks, JG Vertesi-Reynolds, J Rodriguez<br>Journal of Research in Personality 25 (11), 1543-1550 | 2019                                                                                                                                                                                                                                                                                                                                                                                    |
| <a href="#">A cross-sectional, longitudinal study of learning styles in higher education</a><br>JG Vertesi-Reynolds, J Rodriguez, C Holloway<br>Contemporary Educational Psychology 21 (3), 633-645                                                  | 2018                                                                                                                                                                                                                                                                                                                                                                                    |
| <a href="#">Developmental psychopathology: psychoanalytic perspectives</a><br>JG Vertesi-Reynolds<br>Development and Psychopathology 12 (6), 153-160                                                                                                 | 2018                                                                                                                                                                                                                                                                                                                                                                                    |
| <a href="#">Contingency perception and the social-biofeedback model in early socio-emotional development</a><br>M Target, JG Vertesi, J Rodriguez, P Brass<br>Developmental Psychology 7 (4), 19-27                                                  | 2017                                                                                                                                                                                                                                                                                                                                                                                    |
| <a href="#">The Big Five personality traits, learning styles and achievement motivation in higher education</a><br>JG Vertesi, C Hamaker, MR Elshout, P Cooper<br>Social Psychology and Personality Science 19 (6), 47-59                            | 2017                                                                                                                                                                                                                                                                                                                                                                                    |
| <a href="#">Adolescent personality development</a><br>JG Vertesi, B Singer, PB Smith, KW Baltes, S Lopez<br>Social Psychology and Personality Science 9 (5), 562-578                                                                                 | 2016                                                                                                                                                                                                                                                                                                                                                                                    |
| <a href="#">On relations between learning styles, personal and contextual factors, and academic performance</a><br>PL Vermont, JG Vertesi, J Rodriguez, P Cooper<br>Educational Psychology Review 32 (9), 1364-1375                                  | 2015                                                                                                                                                                                                                                                                                                                                                                                    |

## Female Changed Surname Condition

|                                                                                                                                                             |      |
|----------------------------------------------------------------------------------------------------------------------------------------------------------------------------------------------------------------------------------------------|------|
|                                                                                                                                                             |      |
| <b>Jeanette Reynolds</b>                                                                                                                                                                                                                     |      |
| Assistant Professor of Psychology, <a href="#">Baudley University</a><br>Verified email at baudley.edu - <a href="#">Homepage</a><br>developmental psychology social psychology                                                              |      |
|                                                                                                                                                           |      |
| <u>TITLE</u>                                                                                                                                                                                                                                 | YEAR |
| <a href="#">Personality, learning style, intellectual ability, motivation and academic success of psychology students in higher education</a><br>JL Hicks, JG Reynolds, J Rodriguez<br>Journal of Research in Personality 25 (11), 1543-1550 | 2019 |
| <a href="#">A cross-sectional, longitudinal study of learning styles in higher education</a><br>JG Reynolds, J Rodriguez, C Holloway<br>Contemporary Educational Psychology 21 (3), 633-645                                                  | 2018 |
| <a href="#">Developmental psychopathology: psychoanalytic perspectives</a><br>JG Reynolds, P Brass<br>Social Development 12 (6), 153-160                                                                                                     | 2018 |
| <a href="#">Contingency perception and the social-biofeedback model in early socio-emotional development</a><br>M Target, JG Vertesi, J Rodriguez, P Brass<br>British Journal of Developmental Psychology 7 (4), 19-27                       | 2017 |
| <a href="#">The Big Five personality traits, learning styles and achievement motivation in higher education</a><br>JG Vertesi, C Hamaker, MR Elshout, P Cooper<br>Current Research in Social Psychology 19 (6), 47-59                        | 2017 |
| <a href="#">Adolescent personality development</a><br>JG Vertesi, B Singer, PB Smith, KW Baltes, S Lopez<br>Social Development 9 (5), 562-578                                                                                                | 2016 |
| <a href="#">On relations between learning styles, personal and contextual factors, and academic performance</a><br>PL Vermont, JG Vertesi, J Rodriguez, P Cooper<br>Educational Psychology Review 32 (9), 1364-1375                          | 2015 |

## Female Same Surname Condition

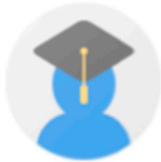

**Jeanette Vertesi**

[FOLLOW](#)

Assistant Professor of Psychology, [Baudley University](#)  
Verified email at baudley.edu - [Homepage](#)  
[developmental psychology](#) [social psychology](#)

| <u>TITLE</u>                                                                                                                                                                                                                                | <u>YEAR</u> |
|---------------------------------------------------------------------------------------------------------------------------------------------------------------------------------------------------------------------------------------------|-------------|
| <a href="#">Personality, learning style, intellectual ability, motivation and academic success of psychology students in higher education</a><br>JL Hicks, JG Vertesi, J Rodriguez<br>Journal of Research in Personality 25 (11), 1543-1550 | 2019        |
| <a href="#">A cross-sectional, longitudinal study of learning styles in higher education</a><br>JG Vertesi, J Rodriguez, C Holloway<br>Contemporary Educational Psychology 21 (3), 633-645                                                  | 2018        |
| <a href="#">Developmental psychopathology: psychoanalytic perspectives</a><br>JG Vertesi, P Brass<br>Social Development 12 (6), 153-160                                                                                                     | 2018        |
| <a href="#">Contingency perception and the social-biofeedback model in early socio-emotional development</a><br>M Target, JG Vertesi, J Rodriguez, P Brass<br>British Journal of Developmental Psychology 7 (4), 19-27                      | 2017        |
| <a href="#">The Big Five personality traits, learning styles and achievement motivation in higher education</a><br>JG Vertesi, C Hamaker, MR Elshout, P Cooper<br>Current Research in Social Psychology 19 (6), 47-59                       | 2017        |
| <a href="#">Adolescent personality development</a><br>JG Vertesi, B Singer, PB Smith, KW Baltes, S Lopez<br>Social Development 9 (5), 562-578                                                                                               | 2016        |
| <a href="#">On relations between learning styles, personal and contextual factors, and academic performance</a><br>PL Vermont, JG Vertesi, J Rodriguez, P Cooper<br>Educational Psychology Review 32 (9), 1364-1375                         | 2015        |

## Male Condition

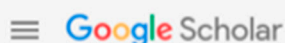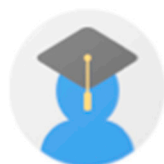

### James Vertesi

[FOLLOW](#)

Assistant Professor of Psychology, [Baudley University](#)  
Verified email at baudley.edu - [Homepage](#)  
developmental psychology social psychology

#### TITLE

#### YEAR

[Personality, learning style, intellectual ability, motivation and academic success of psychology students in higher education](#)

2019

JL Hicks, JG Vertesi, J Rodriguez  
Journal of Research in Personality 25 (11), 1543-1550

[A cross-sectional, longitudinal study of learning styles in higher education](#)

2018

JG Vertesi, J Rodriguez, C Holloway  
Contemporary Educational Psychology 21 (3), 633-645

[Developmental psychopathology: psychoanalytic perspectives](#)

2018

JG Vertesi, P Brass  
Social Development 12 (6), 153-160

[Contingency perception and the social-biofeedback model in early socio-emotional development](#)

2017

M Target, JG Vertesi, J Rodriguez, P Brass  
British Journal of Developmental Psychology 7 (4), 19-27

[The Big Five personality traits, learning styles and achievement motivation in higher education](#)

2017

JG Vertesi, C Hamaker, MR Elshout, P Cooper  
Current Research in Social Psychology 19 (6), 47-59

[Adolescent personality development](#)

2016

JG Vertesi, B Singer, PB Smith, KW Baltes, S Lopez  
Social Development 9 (5), 562-578

[On relations between learning styles, personal and contextual factors, and academic performance](#)

2015

PL Vermont, JG Vertesi, J Rodriguez, P Cooper  
Educational Psychology Review 32 (9), 1364-1375
